1 **Hepatitis E as a cause of adult hospitalization in Bangladesh: Results from an acute**  
2 **jaundice surveillance study in six tertiary hospitals, 2014-2017**

3 Repon C Paul<sup>1,2\*</sup>, Arifa Nazneen<sup>1</sup>, Kajal C Banik<sup>1</sup>, Shariful Amin Sumon<sup>1</sup>, Kishor K Paul<sup>1</sup>, Arifa  
4 Akram<sup>3</sup>, M Salim Uzzaman<sup>3</sup>, Tahir Iqbal<sup>4</sup>, Alexandra Tejada-Strop<sup>4</sup>, Saleem Kamili<sup>4</sup>, Stephen P  
5 Luby<sup>5</sup>, Heather F Gidding, Andrew Hayen<sup>7</sup>, Emily S Gurley<sup>1,8</sup>

6

7 <sup>1</sup>icddr,b, Dhaka, Bangladesh

8 <sup>2</sup>School of Public Health and Community Medicine, UNSW Medicine, Sydney, Australia

9 <sup>3</sup>Institute of Epidemiology, Disease Control and Research, Government of the People's  
10 Republic of Bangladesh

11 <sup>4</sup>Division of Viral Hepatitis, Centers for Disease Control and Prevention, Atlanta, Georgia

12 <sup>5</sup>Infectious Diseases and Geographic Medicine, Stanford University, Stanford, California, USA

13 <sup>6</sup>Faculty of Medicine and Health, University of Sydney

14 <sup>7</sup>Australian Centre for Public and Population Health Research, University of Technology  
15 Sydney, Australia

16 <sup>8</sup>Johns Hopkins Bloomberg School of Public Health, Baltimore, USA

17

18 \*Corresponding author

19 Email: reponpaul@yahoo.com

20

21

22 The findings and conclusions in this report are those of the authors and do not necessarily  
23 represent the official position of the US Centers for Disease Control and Prevention.

## 24 **Abstract**

25           In the absence of reliable data on the burden of hepatitis E virus (HEV) in high  
26 endemic countries, we established a hospital-based acute jaundice surveillance program in  
27 six tertiary hospitals in Bangladesh to estimate the burden of HEV infection among  
28 hospitalized acute jaundice patients aged  $\geq 14$  years, identify seasonal and geographic  
29 patterns in the prevalence of hepatitis E, and examine factors associated with death.  
30 We collected blood specimens from enrolled acute jaundice patients, defined as new onset  
31 of either yellow eyes or skin during the past three months of hospital admission, and tested  
32 for immunoglobulin M (IgM) antibodies against HEV, HBV and HAV. The enrolled patients  
33 were followed up three months after hospital discharge to assess their survival status;  
34 pregnant women were followed up three months after their delivery to assess pregnancy  
35 outcomes.

36           From December'2014 to September'2017, 1925 patients with acute jaundice were  
37 enrolled; 661 (34%) had acute hepatitis E, 48 (8%) had hepatitis A, and 293 (15%) had acute  
38 hepatitis B infection. Case fatality among hepatitis E patients was 5% (28/589). Most of the  
39 hepatitis E cases were males (74%; 486/661), but case fatality was higher among females—  
40 12% (8/68) among pregnant and 8% (7/91) among non-pregnant women. Half of the  
41 patients who died with acute hepatitis E had co-infection with HAV or HBV. Of the 62 HEV  
42 infected mothers who were alive until the delivery, 9 (15%) had miscarriage/stillbirth, and of  
43 those children who were born alive, 19% (10/53) died, all within one week of birth.  
44 This study confirms that hepatitis E is the leading cause of acute jaundice, leads to  
45 hospitalizations in all regions in Bangladesh, occurs throughout the year, and is associated  
46 with considerable morbidity and mortality. Effective control measures should be taken to

- 47 reduce the risk of HEV infections including improvements in water quality, sanitation and
- 48 hygiene practices and the introduction of HEV vaccine to high-risk groups.

## 49 **Author summary**

50           In the absence of reliable surveillance data on the burden of hepatitis E in endemic  
51 countries, we conducted a hospital-based acute jaundice surveillance study over a two and a  
52 half year period in six tertiary hospitals in Bangladesh. The study confirms that HEV  
53 infections occur throughout the year, and is a major (34%) cause of acute jaundice in tertiary  
54 hospitals in Bangladesh. Three-quarters of the acute hepatitis E cases were male, and HEV  
55 infection was higher among patients residing in urban areas than patients in rural areas (41%  
56 vs 32%). The overall case fatality rate of acute HEV infections in hospitals was 5%, but was  
57 higher among pregnant women (12%). Hepatitis E patients who died were more likely to  
58 have co-infection with HAV or HBV than the HEV infected patients who did not die. Fifteen  
59 percent of HEV infected mothers had miscarriage/stillbirth. Of the children who were born  
60 alive, 19% died, all within one week of birth. Considering the high burden of hepatitis E  
61 among hospitalized acute jaundice patients, Bangladesh could take control measures to  
62 reduce this risk including improvements in water quality, sanitation and hygiene practices  
63 and the introduction of hepatitis E vaccine in high-risk areas.

## 64 **Introduction**

65           Hepatitis E virus (HEV) infection causes inflammation of the liver and is an important  
66 cause of acute jaundice, especially in resource-poor countries, where fecal contamination of  
67 drinking water is common [1-3]. HEV genotypes 1 and 2 are predominantly spread by the  
68 fecal-oral route [4]. By contrast, HEV infection in high-income countries occasionally occurs  
69 as a result of zoonosis of genotypes 3 and 4, being transmitted via exposure to wild animals,  
70 and consumption of undercooked pork or game meat [5, 6]. HEV genotypes 1 and 2 in high-  
71 income countries are generally limited to travellers to hepatitis E endemic countries [7, 8].  
72 HEV can cause sporadic cases and small outbreaks [9], but is often responsible for epidemics  
73 in Asia and many parts of Africa [1, 10-12]. The most common clinical feature of  
74 symptomatic HEV infection is jaundice; it is symptomatically indistinguishable from other  
75 causes of acute viral hepatitis [13]. Symptomatic illness due to HEV infection is infrequent in  
76 children [14, 15]; the infection primarily affects young adults, and is generally mild and self-  
77 limiting [2, 16, 17]. However, the case fatality among HEV-infected pregnant women has  
78 been reported to be as high as 6-30% [2, 18-22]. Miscarriages, stillbirths and neonatal deaths  
79 are frequently observed among HEV-infected pregnant women [20, 23-25].

80           The World Health Organization (WHO) identified viral hepatitis as a global health  
81 problem and set a goal to eliminate viral hepatitis by 2030 [26]. Even though an effective  
82 low-cost hepatitis E vaccine is available [27, 28], the vaccine is not recommended for general  
83 use in endemic countries, largely because the burden of disease is not quantified and so it is  
84 unclear if use of the vaccine is appropriate and cost effective [29]. Hepatitis E disease  
85 surveillance data are limited to a few high-income countries [30, 31]; most of the data from  
86 endemic countries are limited to disease outbreak and case series reports.

87 While hospital-based surveillance represents only the burden of severe HEV disease, it can  
88 provide valuable insights, especially regarding the contribution to mortality among severe  
89 acute jaundice patients. Patients with acute jaundice commonly present to hospitals in many  
90 resource-poor hepatitis E endemic countries, including Bangladesh [32-34]. However, there  
91 are few studies in hepatitis E endemic countries that systematically enrolled patients with  
92 acute jaundice to estimate the burden of acute HEV infection in hospital settings, especially  
93 the case fatality rate and delivery outcomes of pregnant women [35, 36]. Previous hospital-  
94 based studies in Bangladesh suggest that most of the cases of acute jaundice (22-64%) were  
95 due to HEV infection, however, those studies were limited to a single study site or a short  
96 study period which may not be a representative estimate of the burden of hepatitis E among  
97 all hospitalized acute jaundice patients in Bangladesh [34, 37, 38].

98 The International Centre for Diarrhoeal Disease Research, Bangladesh (icddr,b) in  
99 collaboration with the Institute of Epidemiology, Disease Control and Research (IEDCR) of  
100 the Government of Bangladesh, and the United States Centers for Disease Control and  
101 Prevention (CDC), conducted a hospital-based acute jaundice surveillance study in six tertiary  
102 hospitals located in five regions of Bangladesh. The objectives of this study were to estimate  
103 the prevalence of HEV infection among acute jaundice patients aged  $\geq 14$  years admitted in  
104 tertiary hospitals in Bangladesh, estimate the case-fatality among these patients and identify  
105 factors associated with mortality, as well as describe seasonal and geographic trends in  
106 prevalence of HEV disease.

## 107 **Methods**

### 108 **Surveillance sites and methods**

109           Hospital-based acute jaundice surveillance was established in six tertiary hospitals,  
110 located in five of seven divisions (the second highest level of geographic and administrative  
111 areas) in Bangladesh (Fig 1). Five of these were government teaching hospitals and one was  
112 a private teaching hospital. Severely ill patients are generally referred to these tertiary  
113 hospitals from lower level hospitals located in the adjacent districts of the surveillance  
114 hospitals. The surveillance started between 6 December 2014 and 27 March 2015  
115 (depending on the hospital) and continued until 30 September 2017 in all six sites.

116

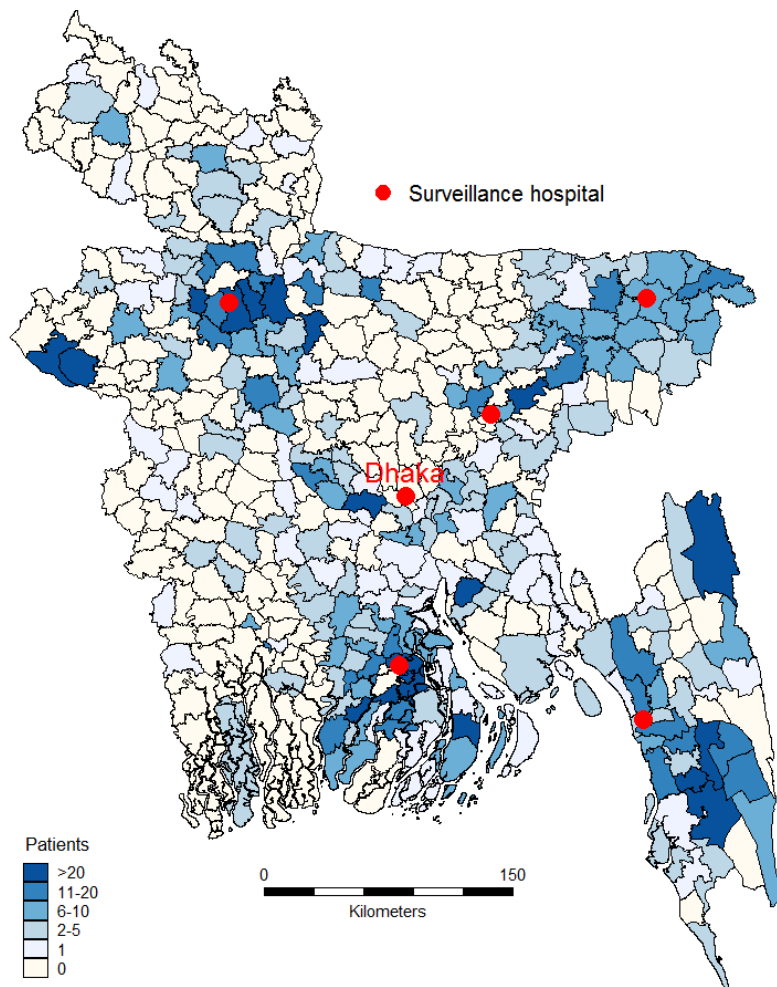

117

118 **Fig 1. Location of acute jaundice surveillance hospitals.**

119 Map of Bangladesh showing the location of surveillance hospitals and number of enrolled  
120 patients with acute jaundice by sub-district during December 2014- September 2017. Map  
121 was created using the SPMAP module for Stata 14 (StataCorp) [39].

122

123 We recruited a physician in each of the six hospitals from the existing staff to oversee  
124 the surveillance activities. A field assistant from icddr,<sup>b</sup> in each hospital assisted the  
125 surveillance physicians to collect patient information and blood specimens, and to store and  
126 transport samples to the laboratory in Dhaka. Every weekday morning, the surveillance  
127 physicians visited the obstetrics and gynaecology wards and the adult medicine wards of the  
128 hospitals and reviewed admission records from the previous day to determine if any patients  
129 aged  $\geq 14$  years met the case definition of acute jaundice. Due to resource constraints, we



130 were unable to conduct surveillance in all wards in each hospital; therefore we restricted  
131 enrolment to adult medicine, obstetrics and gynaecology wards (where patients aged > 14  
132 years are admitted) as children have been reported to have less severe presentations of HEV  
133 infection [14, 15]. Patients with acute jaundice admitted on Friday were enrolled on the next  
134 working day, as study staff did not work on Fridays. Acute jaundice was defined as new  
135 onset of either yellow eyes or skin for less than 3 months, and continuing on the day of  
136 admission. The field assistants also visited the intensive care unit (ICU) every weekday to  
137 ensure that no acute jaundice cases were overlooked. If anyone met the case definition of  
138 acute jaundice, the surveillance physicians recorded enrolled patients' illness history and  
139 relevant clinical information along with basic demographic information and contact  
140 information in a handheld computer using a structured case investigation form. The  
141 surveillance physicians also collected a 5 ml blood specimen for laboratory testing.

#### 142 **Sample processing and laboratory testing**

143 On the same day of sample collection, the field assistants centrifuged the blood  
144 specimen and prepared three aliquots of sera. One aliquot containing about 400µl of serum  
145 was sent to the hospital laboratory the same day of sample collection to test for bilirubin  
146 and glutamic-pyruvic transaminase to assess liver function. Two aliquots of serum were  
147 stored at the surveillance hospitals in a liquid nitrogen dry shipper and transported to the  
148 laboratory of IEDCR in Dhaka every two weeks. The samples were kept in a freezer at IEDCR  
149 at -80°C until they were tested. The samples were tested for IgM and IgG antibodies to HEV  
150 using enzyme-linked immunosorbent assay (ELISA) kits manufactured by Wantai, China  
151 (Beijing Wantai Biologic Pharmacy Enterprise Co., Ltd, Beijing, China) according to the  
152 manufacturer's instructions. Acute HEV infection was defined as a positive test result for

153 anti-HEV IgM antibodies. We also tested all samples for hepatitis A virus IgM antibodies  
154 (anti-HAV IgM) (a marker of HAV infection) and hepatitis B virus surface antigen (HBsAg) (a  
155 marker of acute or chronic HBV infection). The samples that were positive for HBsAg were  
156 also tested for hepatitis B virus core IgM antibodies (anti-HBc IgM; a marker of acute HBV  
157 infection). Chronic HBV infection was defined as a positive test result for HBsAg but negative  
158 test result for anti-HBc IgM. HBsAg negative samples are generally negative for anti-HBc IgM  
159 [40], therefore, only the HBsAg positive samples were tested for anti-HBc IgM. ELISA test kits  
160 manufactured by DiaSorin, Italy were used for testing anti-HAV IgM, HBsAg and anti-HBc  
161 IgM.

162 We sent a subset of samples (collected between December 2014 and December  
163 2016) to the Division of Viral Hepatitis Laboratory of the US Centers for Disease Control and  
164 Prevention (CDC), Atlanta, USA to test for HEV RNA. All samples from patients with onset  
165 within three weeks of the blood draw were selected for RNA testing. For other patients, a  
166 random sample of 20% of anti-HEV IgM positive samples, 20% of anti-HEV IgG positive  
167 samples, 20% of samples negative for both IgM and IgG were chosen to test for HEV RNA.  
168 Serum samples were tested for HEV RNA using a quantitative real-time reverse transcriptase  
169 polymerase chain reaction (PCR) assay, capable of detecting HEV genotypes 1-3 with a limit  
170 of detection of 25 IU/ml, targeting a 69-bp fragment of open reading frame (ORF) 3 of HEV  
171 genome [41]. For quality assurance, the samples that were sent to CDC were also retested  
172 for anti-HEV IgM using the same ELISA kit as was used at the laboratory in Bangladesh.

### 173 **Patient follow-up**

174 All enrolled patients were followed up during their hospitalization by the surveillance  
175 physicians to monitor the outcomes of the illness episode and the pregnancy outcomes for

176 pregnant patients. If the pregnancy ended during hospitalization and the outcome was a live  
177 birth, the surveillance physician examined the newborn to collect clinical information and  
178 note any signs or symptoms of jaundice. All enrolled patients and the newborns were  
179 followed up 3 months post hospital discharge to ascertain their vital status. If a pregnant  
180 woman with jaundice was released from the hospital before the end of her pregnancy, the  
181 field assistants followed up with her by phone one week after the expected date of delivery  
182 and three months after the date of delivery to check on the health of the mother and the  
183 newborn (S1 Table). For patients who did not have a phone, the field assistants visited their  
184 home to follow-up. Follow up three months post hospital discharge was not possible for the  
185 patients who were admitted to surveillance hospitals after June 30, 2017, as the surveillance  
186 ended on September 30, 2017.

## 187 **Data analysis**

188 We calculated the prevalence of acute HEV infection among patients with acute  
189 jaundice in each surveillance hospital and overall. Seroprevalence of acute hepatitis E was  
190 also calculated by patients' demographic characteristics and rural-urban area of residence.  
191 We compared the signs and symptoms during illness, pregnancy complications, pregnancy  
192 outcome and case fatality between acute jaundice patients with and without evidence of  
193 acute HEV infection. We examined potential risk factors of death among patients with acute  
194 hepatitis E including co-infection with other hepatitis viruses (HAV, HBV). Comparison  
195 between categorical variables was performed using the chi-squared test or Fisher exact test  
196 where appropriate and comparison between continuous variables (non-normal distribution)  
197 was performed using the Wilcoxon rank sum test. The 95% confidence interval for  
198 proportions was calculated by using the Wilson method for a binomial distribution [42]. We

199 examined the monthly trends in the number of patients with anti-HEV IgM antibodies. We  
200 also calculated the proportion of patients positive for anti-HEV IgM and anti-HEV IgG by  
201 duration of illness at the time of admission to hospital. The onset of illness was defined as  
202 the date when the patient first reported experiencing yellow eyes or skin or  
203 nausea/vomiting. Analyses were conducted in Stata 14 (StataCorp).

#### 204 **Human subjects**

205         The surveillance physicians sought consent from the patients, or their guardians in  
206 the case of severely ill patients, to enrol them in the study. Written informed consent was  
207 obtained from patients aged over 17 years. For patients aged between 14 and 17 years,  
208 written assent was taken from the patients as well as obtaining written consent from their  
209 parents or guardians. The study protocol was reviewed and approved by the institutional  
210 review board of the icddr,b. US CDC involvement in the study did not constitute engagement  
211 in human subjects research and therefore, CDC relied on appropriate IRB or ethics  
212 committee approval of engaged institutions.

## 213 **Results**

### 214 **Patient characteristics**

215 In the six surveillance hospitals, a total of 2,091 patients aged  $\geq 14$  years met the case  
216 definition of acute jaundice during December 2014 to September 2017. Of them, 1,925  
217 (92%) agreed to be enrolled in the study and provided a blood specimen for laboratory  
218 testing (S1 Fig). Of the enrolled patients, 1,314 (68%) were male and 958 (50%) were aged  
219 between 14 and 29 years. Of the female patients, 192 (31%) were pregnant. Patients  
220 admitted to the surveillance hospitals resided in 56 out of 64 districts in Bangladesh;  
221 however, a higher number of patients lived near surveillance hospitals (Fig 1).

### 222 **Laboratory testing and HEV seroprevalence**

223 Among the 1,925 enrolled patients, 661 (34%) had IgM antibodies detected against  
224 HEV (acute HEV infection) and 652 (99%) of these also had IgG antibodies against HEV.  
225 Overall, 1,036 (54%) patients had detectable anti-HEV IgG antibodies. There were 148 (8%)  
226 patients who were positive for anti-HAV IgM antibodies and 663 (34%) who were positive for  
227 HBsAg. Of the 663 HBsAg positive patients, 293 (15% of all patients) had acute HBV infection.  
228 Among the 661 acute HEV patients, 9 (1%) also had acute HAV infection, 15 (2%) had acute  
229 HBV infection and 132 (20%) had chronic HBV infection.

230 Of the 661 patients with acute HEV infection, 483 (73%) resided in rural areas, 486  
231 (74%) were male; their median age was 25 years (IQR: 20-33). Acute hepatitis E prevalence  
232 varied across the hospital sites, ranging from 17% in Sylhet to 61% in Dhaka (Table 1).

233 Among the patients with acute jaundice, those who were male, aged between 20 to 39  
234 years, resided in urban areas, educated, or whose monthly family expenditure was  $>15,000$

235 takas (US\$188) were more likely to have acute HEV infection ( $p < 0.001$ ). Acute HEV infection  
 236 was higher among the pregnant women with acute jaundice than the non-pregnant women  
 237 with acute jaundice (39% vs. 24%,  $p < 0.001$ ). The higher rate of acute HEV infection among  
 238 educated and higher income group patients with acute jaundice in the study hospitals was  
 239 consistent in the analysis by rural-urban area of residence (S2 Table).

240 **Table 1. Hepatitis E serological test results by demographic characteristics of patients with**  
 241 **acute jaundice in six tertiary hospitals in Bangladesh, December 2014–September 2017**

| Characteristics                        | Number of patients | Anti-HEV IgM Positive |                  | P-value <sup>a</sup> |
|----------------------------------------|--------------------|-----------------------|------------------|----------------------|
|                                        |                    | n                     | Percent (95% CI) |                      |
| Total patients                         | 1925               | 661                   | 34 (32-37)       |                      |
| Hospital sites                         |                    |                       |                  | <0.001               |
| Bogra                                  | 405                | 79                    | 20 (16-24)       |                      |
| Barisal                                | 366                | 174                   | 48 (42-53)       |                      |
| Kishoregonj                            | 200                | 36                    | 18 (13-24)       |                      |
| Chittagong                             | 435                | 160                   | 37 (32-42)       |                      |
| Sylhet                                 | 237                | 40                    | 17 (12-22)       |                      |
| Dhaka                                  | 282                | 172                   | 61 (55-67)       |                      |
| Sex                                    |                    |                       |                  | <0.001               |
| Male                                   | 1314               | 486                   | 37 (34-40)       |                      |
| Female                                 | 611                | 175                   | 29 (25-32)       |                      |
| Pregnancy status of women <sup>b</sup> |                    |                       |                  | <0.001               |
| Non-Pregnant                           | 418                | 101                   | 24 (20-29)       |                      |
| Pregnant                               | 192                | 74                    | 39 (32-46)       |                      |
| Age-group ( in years)                  |                    |                       |                  | <0.001               |
| 14-19                                  | 341                | 124                   | 36 (31-42)       |                      |
| 20-29                                  | 617                | 294                   | 47 (44-52)       |                      |
| 30-39                                  | 349                | 142                   | 41 (35-46)       |                      |
| 40-49                                  | 236                | 65                    | 28 (22-34)       |                      |
| 50-59                                  | 184                | 28                    | 15 (10-21)       |                      |
| 60+                                    | 188                | 8                     | 4 (2-8)          |                      |

| Characteristics                                                | Number of patients | Anti-HEV IgM Positive |                  | P-value <sup>a</sup> |
|----------------------------------------------------------------|--------------------|-----------------------|------------------|----------------------|
|                                                                |                    | n                     | Percent (95% CI) |                      |
| Residence                                                      |                    |                       |                  | <0.001               |
| Rural                                                          | 1494               | 483                   | 32 (30-35)       |                      |
| Urban                                                          | 431                | 178                   | 41 (37-46)       |                      |
| Education                                                      |                    |                       |                  | <0.001               |
| None                                                           | 383                | 63                    | 16 (13-21)       |                      |
| Class 1-5                                                      | 574                | 175                   | 31 (27-34)       |                      |
| Class 6-11                                                     | 644                | 259                   | 40 (36-44)       |                      |
| Class 12 or more                                               | 324                | 164                   | 51 (45-56)       |                      |
| Monthly household expenditure in Bangladeshi taka <sup>c</sup> |                    |                       |                  | <0.001               |
| < 5000 (US\$ 62)                                               | 270                | 48                    | 18 (13-23)       |                      |
| 5000-9,999 (US\$ 63-125)                                       | 717                | 214                   | 30 (27-33)       |                      |
| 10,000-14,999 (US\$ 126-187)                                   | 399                | 142                   | 36 (31-41)       |                      |
| ≥ 15,000 (US\$188)                                             | 328                | 138                   | 42 (37-48)       |                      |

242  
243  
244  
245  
246

<sup>a</sup> chi-squared test

<sup>b</sup> Percentage was calculated among female patients

<sup>c</sup> Monthly household expenditure was unknown for 211 patients

Anti-HEV IgM= Immunoglobulin M antibodies against HEV

247           Patients who were admitted to hospital between one and two weeks of onset of  
248 illness had the highest anti-HEV IgM positivity (42%; Fig 2). The proportion who were anti-  
249 HEV IgM positive declined with time after two weeks of onset of illness ( $\chi^2$  for trend: 21.3;  $p$   
250 <0.001). Patients admitted to hospital with acute HEV infection were detected every month  
251 but no specific seasonal pattern was observed during the surveillance period (Fig 3).  
252 However, the number of hepatitis E cases generally increased over time.

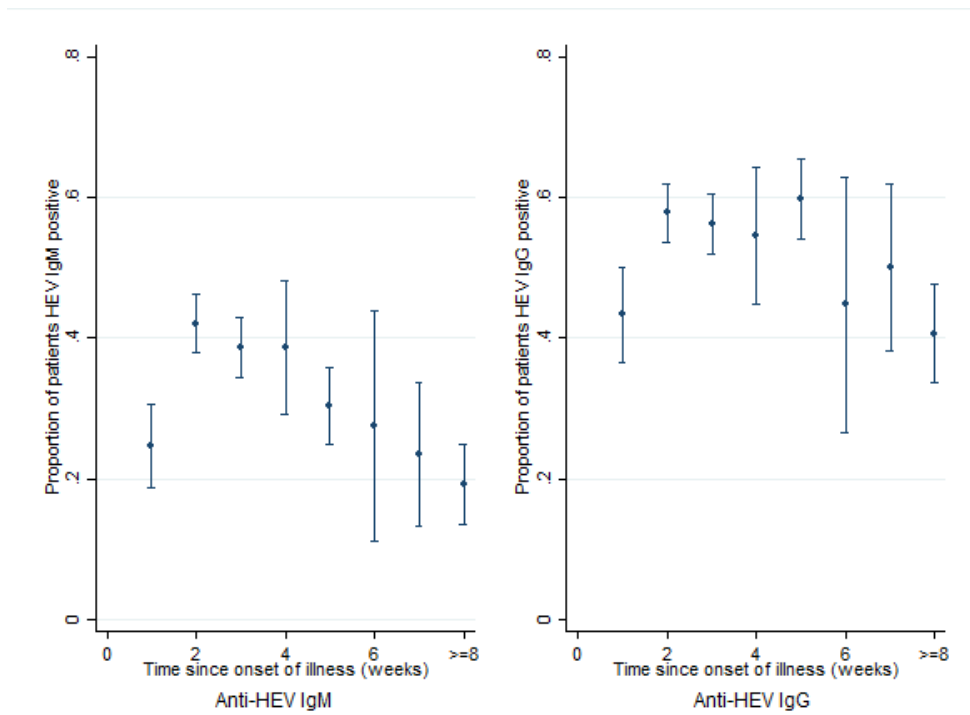

253

254 **Fig 2. Proportion of patients positive for anti-HEV IgM and anti-HEV IgG by duration of**  
 255 **illness at the time of admission to hospital in six tertiary hospitals in Bangladesh,**  
 256 **December 2014- September 2017**

257

258

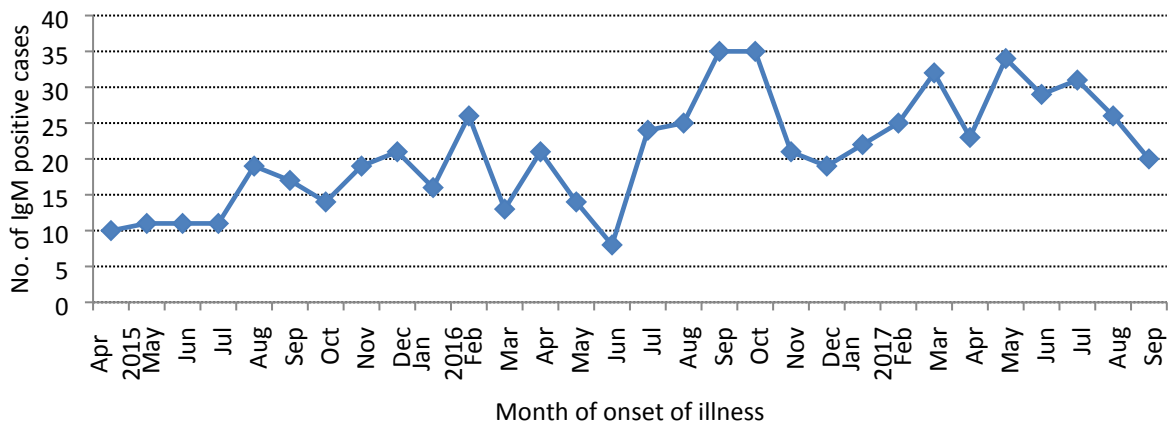

259

260 **Fig 3. Number of anti-HEV IgM positive cases by the month of onset of illness among**  
 261 **patients with acute jaundice admitted in six tertiary hospitals in Bangladesh, April 2015–**  
 262 **September 2017**

263 Note: Since surveillance was established in all hospitals by March, 2015, the seasonality curve covered the period from April  
 264 2015 to September 2017.

265



266 Most of the signs and symptoms were similar for anti-HEV IgM positive and negative  
 267 patients (Table 2). However, oedema, distended abdomen, melaena and unconsciousness  
 268 were observed more often among anti-HEV IgM negative patients than anti-HEV IgM  
 269 positive patients. The median serum glutamic-pyruvic transaminase level was significantly  
 270 higher among anti-HEV IgM positive patients than the anti-HEV IgM negative patients [520  
 271 (range: 221-1100) IU/L vs. 140 (range: 60-394) IU/L;  $p < 0.001$ ].

272 **Table 2. Signs and symptoms during illness among anti-HEV IgM positive and negative**  
 273 **patients admitted in six tertiary hospitals in Bangladesh, December 2014–September 2017**

| <b>Signs and symptoms during illness</b>                                          | <b>Anti-HEV IgM<br/>Positive<br/>(N=661)<br/>n (%)</b> | <b>Anti-HEV IgM<br/>Negative<br/>(N=1,264)<br/>n (%)</b> | <b>P-<br/>value<sup>a</sup></b> |
|-----------------------------------------------------------------------------------|--------------------------------------------------------|----------------------------------------------------------|---------------------------------|
| <b>Examined by physicians</b>                                                     |                                                        |                                                          |                                 |
| Yellow skin                                                                       | 660 (100)                                              | 1,258 (100)                                              | 0.263                           |
| Yellow eyes                                                                       | 660 (100)                                              | 1,262 (100)                                              | 0.971                           |
| Oedema                                                                            | 30 (5)                                                 | 164 (13)                                                 | <0.001                          |
| Dehydration                                                                       | 134 (20)                                               | 237 (19)                                                 | 0.425                           |
| Distended abdomen                                                                 | 69 (10)                                                | 228 (18)                                                 | <0.001                          |
| <b>Reported by patients/caregivers</b>                                            |                                                        |                                                          |                                 |
| Fever                                                                             | 596 (90)                                               | 1,121 (89)                                               | 0.321                           |
| Nausea/vomiting                                                                   | 602 (91)                                               | 1,079 (85)                                               | <0.001                          |
| Anorexia                                                                          | 536 (81)                                               | 1,020 (81)                                               | 0.862                           |
| Abdominal pain                                                                    | 396 (60)                                               | 779 (62)                                                 | 0.450                           |
| Melaena/ Clay-colored stools                                                      | 107 (16)                                               | 260 (21)                                                 | 0.020                           |
| Unconsciousness                                                                   | 37 (6)                                                 | 115 (9)                                                  | 0.007                           |
| <b>Liver function test result</b>                                                 |                                                        |                                                          |                                 |
| Serum total bilirubin levels, mg/dl , median(IQR) <sup>b</sup>                    | 9 (9-13)                                               | 8 (4-15)                                                 | 0.063                           |
| Patient with above the normal bilirubin level<br>(Reference level: 0.2-1.2 mg/dl) | 654 (100)                                              | 1,193 (95)                                               | <0.001                          |
| Serum Glutamic-Pyruvic Transaminase (SGPT),<br>IU/L, median(IQR) <sup>†</sup>     | 520 (221-1100)                                         | 140 (60-394)                                             | <0.001                          |
| Patient with above the normal SGPT level<br>(Reference level: 20-60 IU/L)         | 613 (94)                                               | 946 (76)                                                 | <0.001                          |

<sup>a</sup> Chi-squared test comparing anti-HEV IgM result and patients' symptoms during illness

<sup>b</sup> Wilcoxon rank sum test

274  
 275  
 276

277           Of the 115 anti-HEV IgM positive samples that were sent to CDC, 73 (64%) were  
278 positive for HEV RNA; none of the anti-HEV IgM negative samples (n=403) were positive for  
279 HEV RNA. In CDC laboratory, all of the samples that tested anti-HEV IgM negative in  
280 Bangladesh except one were negative (402 of 403) and all of the anti-HEV IgM samples that  
281 tested positive in Bangladesh except two were positive (113 of 115).

## 282 **Patient follow-up**

283           Of the 1,925 patients with acute jaundice, we followed up 1,765 (92%), and of them  
284 302 (17%) died. Among those who died, 65 (22%) died during hospitalization and the  
285 remaining died after leaving hospital but within three months of hospital discharge. Patients  
286 with acute HEV infection were significantly less likely to die than the patients who were HEV  
287 negative [4.8% (95% CI: 3.2%-6.8%) vs. 23.3% (95% CI: 20.9%-25.8%);  $p<0.001$ , Table 3].  
288 Among the acute hepatitis E patients, case fatality was higher among females than males  
289 (9% vs. 3%;  $p<0.001$ ), particularly among pregnant women (12%). HEV infected patients who  
290 died were more likely to be aged  $\geq 60$  years, have a higher level of serum bilirubin ( $\geq 15$   
291 mg/dl), have co-infection with HAV or HBV than the HEV infected patients who did not die  
292 (Table 3). Fourteen of the 28 deaths in HEV infected patients (50%) and 67 of 274 deaths in  
293 HEV uninfected patients (24%) occurred within the first week of hospitalisation.

294 **Table 3. Survival status of patients with acute jaundice admitted in six tertiary hospitals in Bangladesh, December 2014-September 2017**  
 295 **(patients followed-up 3 months post hospital discharge)**

| Characteristics           | Anti-HEV IgM (+) patients |           |                     |                      | Anti-HEV IgM (-) patients |           |                     |                      | All patients         |               |
|---------------------------|---------------------------|-----------|---------------------|----------------------|---------------------------|-----------|---------------------|----------------------|----------------------|---------------|
|                           | Patients followed-up      | Died<br>n | Percent<br>(95% CI) | P-value <sup>a</sup> | Patients followed-up      | Died<br>n | Percent<br>(95% CI) | P-value <sup>a</sup> | Patients followed-up | Died<br>n (%) |
| Number of patients        | 589                       | 28        | 5 (3-7)             |                      | 1176                      | 274       | 23 (21-26)          |                      | 1765                 | 302 (17)      |
| Sex                       |                           |           |                     | 0.001                |                           |           |                     | 0.07                 |                      |               |
| Male                      | 430                       | 13        | 3 (2-5)             |                      | 762                       | 165       | 22 (19-25)          |                      | 1192                 | 178 (15)      |
| Female                    | 159                       | 15        | 9 (5-15)            |                      | 414                       | 109       | 26 (22-31)          |                      | 573                  | 124 (22)      |
| Pregnancy status of women |                           |           |                     | 0.574                |                           |           |                     | 0.017                |                      |               |
| Non-Pregnant              | 91                        | 7         | 8 (3-15)            |                      | 300                       | 90        | 30 (25-36)          |                      | 391                  | 97 (25)       |
| 1st/2nd trimester         | 40                        | 4         | 10 (3-24)           |                      | 32                        | 7         | 22 (9-40)           |                      | 72                   | 11 (15)       |
| 3rd trimester             | 28                        | 4         | 14 (4-33)           |                      | 82                        | 12        | 15 (8-24)           |                      | 110                  | 16 (15)       |
| Age-group (years)         |                           |           |                     | <0.001               |                           |           |                     | <0.001               |                      |               |
| 14-19                     | 114                       | 4         | 4 (1-9)             |                      | 201                       | 17        | 9 (5-13)            |                      | 315                  | 21 (7)        |
| 20-29                     | 263                       | 7         | 3 (1-5)             |                      | 313                       | 25        | 8 (5-12)            |                      | 576                  | 32 (6)        |
| 30-39                     | 122                       | 7         | 6 (2-11)            |                      | 189                       | 33        | 18 (12-24)          |                      | 311                  | 40 (13)       |
| 40-49                     | 55                        | 5         | 9 (3-20)            |                      | 159                       | 55        | 35 (27-43)          |                      | 214                  | 60 (28)       |
| 50-59                     | 27                        | 2         | 7 (1-24)            |                      | 143                       | 54        | 38 (30-46)          |                      | 170                  | 56 (33)       |
| 60+                       | 8                         | 3         | 38 (9-76)           |                      | 171                       | 90        | 53 (45-60)          |                      | 179                  | 93 (52)       |

| Characteristics                                          | Anti-HEV IgM (+) patients |                 |                  |                      | Anti-HEV IgM (-) patients |      |                  |                      | All patients         |            |
|----------------------------------------------------------|---------------------------|-----------------|------------------|----------------------|---------------------------|------|------------------|----------------------|----------------------|------------|
|                                                          | Patients followed-up      | Died            |                  | P-value <sup>a</sup> | Patients followed-up      | Died |                  | P-value <sup>a</sup> | Patients followed-up | Died n (%) |
|                                                          |                           | n               | Percent (95% CI) |                      |                           | n    | Percent (95% CI) |                      |                      |            |
| Serum total bilirubin levels                             |                           |                 |                  | 0.001                |                           |      |                  | <0.001               |                      |            |
| < 5.0 mg/dl                                              | 106                       | 4               | 4 (1-9)          |                      | 362                       | 52   | 14 (11-18)       |                      | 468                  | 56 (12)    |
| 5.0-9.9 mg/dl                                            | 233                       | 6               | 3 (1-6)          |                      | 320                       | 64   | 20 (16-25)       |                      | 553                  | 70 (13)    |
| 10.0-14.9 mg/dl                                          | 134                       | 4               | 3 (1-7)          |                      | 211                       | 64   | 30 (24-37)       |                      | 345                  | 68 (20)    |
| >= 15.0 mg/dl                                            | 116                       | 14              | 12 (7-19)        |                      | 283                       | 94   | 33 (28-39)       |                      | 399                  | 108 (27)   |
| Serum glutamic-pyruvic transaminase                      |                           |                 |                  | 0.082                |                           |      |                  | 0.001                |                      |            |
| < 200 IU/L                                               | 140                       | 12              | 9 (5-15)         |                      | 696                       | 181  | 26 (23-29)       |                      | 836                  | 193 (23)   |
| 200-499 IU/L                                             | 150                       | 7               | 5 (2-9)          |                      | 248                       | 62   | 25 (20-31)       |                      | 398                  | 69 (17)    |
| 500-999 IU/L                                             | 133                       | 3               | 2 (0-6)          |                      | 126                       | 21   | 17 (11-24)       |                      | 259                  | 24 (9)     |
| >= 1000 IU/L                                             | 162                       | 6               | 4 (1-8)          |                      | 104                       | 10   | 10 (5-17)        |                      | 266                  | 16 (6)     |
| Anti-HAV IgM (+)                                         | 8                         | 2               | 25 (3-65)        | 0.007                | 132                       | 2    | 2 (0-5)          | <0.001               | 140                  | 4 (3)      |
| Anti-HBc IgM (+)                                         | 12                        | 3               | 25 (5-57)        | 0.001                | 258                       | 43   | 17 (12-22)       | 0.004                | 270                  | 46 (17)    |
| HBsAg positive (+)                                       | 134                       | 12 <sup>b</sup> | 9 (5-15)         | 0.009                | 487                       | 98   | 20 (17-24)       | 0.03                 | 621                  | 110 (18)   |
| Duration of illness at the time of admission to hospital |                           |                 |                  | 0.191                |                           |      |                  | <0.001               |                      |            |
| < 2 weeks                                                | 250                       | 8               | 3 (1-6)          |                      | 443                       | 65   | 15 (12-18)       |                      | 693                  | 73 (11)    |
| 2-4 weeks                                                | 203                       | 9               | 4 (2-8)          |                      | 344                       | 70   | 20 (16-25)       |                      | 547                  | 79 (14)    |
| 5-6 weeks                                                | 89                        | 7               | 8 (3-16)         |                      | 202                       | 63   | 31 (25-38)       |                      | 291                  | 70 (24)    |
| > 6 weeks                                                | 47                        | 4               | 9 (2-20)         |                      | 187                       | 76   | 41 (34-48)       |                      | 234                  | 80 (34)    |

<sup>a</sup> Chi-Squared test comparing proportion of deaths by patient characteristics

<sup>b</sup> Three of the HBsAg positive cases were also positive for Anti-HBc IgM

298 Among the 192 enrolled pregnant women, we followed up 173 (90%) of them until  
 299 the outcome of their pregnancy. Among the 66 mothers who were anti-HEV IgM positive, 53  
 300 (80%) had a live birth and among the 107 mothers who were anti-HEV IgM negative, 72  
 301 (67%) had a live birth (Table 4). Of the 62 HEV infected mothers who were alive until the  
 302 delivery, 9 (15%) had a miscarriage or stillbirth. Nineteen percent (10/53) of the live-born  
 303 babies born to mothers with acute HEV infection died compared to 7% (5/72) of babies born  
 304 to women without HEV infection (p=0.038). The median age at death of the babies who  
 305 were born to HEV infected mothers was two days (IQR: 1-3 days; all within one week) and  
 306 was five days (IQR: 2-8 days) who were born to HEV uninfected mothers (p=0.207).

307 **Table 4. Reported complications during pregnancy, pregnancy outcomes and survival**  
 308 **status of newborn babies by anti-HEV IgM test status of mother in six tertiary hospitals in**  
 309 **Bangladesh, December 2014–September 2017**

| Characteristics                                | Among anti-HEV<br>IgM (+) cases |                     | Among anti-HEV<br>IgM (-) cases |                     | P-value <sup>a</sup> |
|------------------------------------------------|---------------------------------|---------------------|---------------------------------|---------------------|----------------------|
|                                                | n                               | Percent<br>(95% CI) | n                               | Percent<br>(95% CI) |                      |
| <b>Complications during pregnancy/delivery</b> | <b>N=66</b>                     |                     | <b>N=107</b>                    |                     |                      |
| Excessive vaginal bleeding                     | 18                              | 27 (18-39)          | 48                              | 45 (36-54)          | 0.021                |
| Convulsions                                    | 7                               | 11 (5-20)           | 18                              | 17 (11-25)          | 0.259                |
| Unconscious                                    | 10                              | 15 (8-26)           | 26                              | 24 (17-33)          | 0.15                 |
| <b>Pregnancy outcomes</b>                      | <b>N=66</b>                     |                     | <b>N=107</b>                    |                     | 0.282                |
| Live birth                                     | 53                              | 80 (59-88)          | 72                              | 67 (58-75)          |                      |
| Still birth                                    | 6                               | 9 (4-18)            | 21                              | 20 (13-28)          |                      |
| Miscarriage (Spontaneous Abortion)             | 2                               | 3 (1-10)            | 3                               | 3 (1-8)             |                      |
| Induced abortion                               | 1                               | 2 (0-8)             | 5                               | 5 (2-10)            |                      |
| Patient died before pregnancy outcome          | 4                               | 6 (2-15)            | 6                               | 6 (3-12)            |                      |
| <b>Follow-up of live-births</b>                | <b>N=53</b>                     |                     | <b>N=72</b>                     |                     |                      |
| Neonatal deaths                                | 10                              | 19 (11-31)          | 5                               | 7 (3-15)            | 0.038                |

310 Note: Out of 192 pregnant women, 173 women could be followed-up for pregnancy outcome; out of 125 live-births,  
 311 124 could be followed up

312 <sup>a</sup> Chi-squared test comparing anti-HEV IgM result and different characteristics

313

## 314 Discussion

315 This study confirms that HEV is a major cause of acute jaundice, is often serious  
316 enough to require hospitalization in all regions in Bangladesh, occurs throughout the year,  
317 and is associated with considerable mortality, especially among pregnant women and those  
318 co-infected with other hepatitis viruses (HAV or HBV). Fifteen percent of HEV infected  
319 pregnant women had a miscarriage or stillbirth, and of the children who were born alive,  
320 19% died, all within one week of birth. Three-quarters of the acute hepatitis E cases in  
321 hospitals were male, and HEV infection was higher among patients residing in urban areas  
322 than patients in rural areas (41% vs 32%).

323 Previous estimates of hepatitis E prevalence among hospitalized acute jaundice  
324 patients in other endemic countries ranges from 10-70% [35, 36]. One study in Bangladesh  
325 tested 22 fulminant hepatitis patients admitted in a tertiary hospital and detected acute HEV  
326 infection among 64% of the patients [37]. Another study in Bangladesh tested 69  
327 retrospectively collected samples from admitted acute-on-chronic liver failure patients in the  
328 hepatology unit of a tertiary hospital and identified acute HEV infection among 22% of the  
329 samples [34]. The large variation of hepatitis E prevalence might be due to the small number  
330 of patients recruited, geographic location of hospitals, and the types of patients recruited.  
331 One study that recruited a large number of acute hepatitis patients (685 patients during four  
332 years) from the liver clinic of a tertiary hospital in India reported the prevalence of hepatitis  
333 E as 39% [43], which is similar to the estimate in our study.

334 About three-quarters of laboratory-confirmed HEV infected patients were males. One  
335 explanation for this may be that males are more involved in outdoor activities than females  
336 in low- and middle-income countries [44], putting them at higher risk for exposure to

337 contaminated drinking water. Other reasons for this observation could be due to gender  
338 differences in health-seeking behaviour and access to health services. A recent study noted  
339 that healthcare expenditure on females is significantly lower than on males in low-income  
340 settings [45].

341         Hepatitis E patients were more likely to be more educated, reside in urban areas and  
342 from a high-income group than HEV negative acute jaundice patients. Higher HEV infection  
343 rates among educated and high-income group patients might be associated with higher  
344 exposure to contaminated drinking water due to their greater involvement in jobs outside  
345 the home as reported in previous studies [12, 46]. An alternative explanation might be that  
346 children in low socio-economic groups are exposed to pathogens frequently at a young age  
347 and so develop robust immunity that protects them from clinically severe illness later in life  
348 [47]. This pattern of higher risk of illness among wealthier adolescents and young adults has  
349 been observed in some other fecal-oral transmitted diseases, most notably hepatitis A and  
350 typhoid fever [48-50]. Higher HEV infection among patients who resided in urban areas  
351 might be related to higher possibility of fecal contamination of drinking water sources in  
352 urban settings. In large cities in Bangladesh, municipal water pipes are commonly exposed to  
353 sewerage lines which may lead to fecal contamination of drinking water [51].

354         Although most reported hepatitis E epidemics have been related to fecally  
355 contaminated drinking water in the rainy season and hot summer months [13], we did not  
356 observe any strong seasonal trend. There were no reported hepatitis E outbreaks in  
357 Bangladesh during the surveillance period. A previous study conducted in a private  
358 laboratory in Dhaka identified small outbreaks of HEV infections throughout the year [9]. The

359 patients in our surveillance hospitals might be sporadic cases of hepatitis E or cases from  
360 small outbreaks that occurred throughout the year, as was observed in that study [9].

361           There are a number of limitations of our study. We observed a declining trend in HEV  
362 infection positivity by the duration of onset of illness at the time of hospitalization (Fig 2).  
363 Anti-HEV IgM antibody titres might have waned for patients who were admitted to hospital  
364 in the later stage of their illness [52]; this may lead to an underestimate the rate of HEV  
365 infection among acute jaundice patients. In our study, we used Wantai ELISA which is largely  
366 accepted as the most sensitive among the available commercial assays [53]. However, the  
367 study conducted by Huang et al. observed that about 3% of acute hepatitis cases (defined as  
368 acute liver damage evidenced by a 2.5 fold upper limit of the normal level of alanine  
369 aminotransferase) were negative for anti-HEV IgM (using the Wantai kit) but had a 4-fold  
370 rise in anti-HEV IgG in their convalescent sera [52], which indicates an acute HEV infection  
371 [54-56]. Therefore, our results likely underestimate the true prevalence of acute hepatitis E  
372 due to the performance of the test kit. HEV infections are generally self-limiting and do not  
373 require hospitalization [2] and the patients admitted in tertiary hospitals are severely ill;  
374 therefore, the findings in our study represent only the prevalence of hepatitis E among  
375 severely ill patients. Finally, in our study, the etiological agent of acute jaundice was  
376 unknown for about one-third of the patients, and the samples were not tested for hepatitis  
377 C virus.

378           This study provides a reliable estimate of the prevalence of HEV infection among  
379 hospitalized patients with acute jaundice in a hepatitis E endemic country by enrolling  
380 patients admitted from a wide geographic area through systematic surveillance over a two  
381 and a half year period. It confirms that hepatitis E is the leading cause of acute jaundice in



382 Bangladesh. We identified a high prevalence of hepatitis E among patients with acute  
383 jaundice in all of the hospitals included in the study and throughout the multiple ecological  
384 zones in Bangladesh. Hepatitis E is therefore a considerable public health problem in  
385 Bangladesh. Considering the high burden of HEV among hospitalized patients with acute  
386 jaundice, Bangladesh could consider to take control measures to reduce this risk including  
387 improvements in water quality, sanitation and hygiene practices and the introduction of  
388 hepatitis E vaccine in high-risk areas. An improved understanding of the burden of hepatitis  
389 E is required in other endemic countries to plan for effective global actions to prevent HEV  
390 infections including the introduction of hepatitis E vaccine.

## 391 **Supporting information**

392 **S1 Checklist. STROBE checklist.**

393 **S1 Table. Post hospital discharge follow-up schedule of enrolled patients in the**  
394 **surveillance hospitals.**

395 **S1 Fig. Flow chart of patient enrolment, laboratory testing and follow-up in the**  
396 **surveillance hospitals.**

397 **S2 Table. Hepatitis E serological test results by educational status and residence (rural-**  
398 **urban) of patients with acute jaundice in six tertiary hospitals in Bangladesh, December**  
399 **2014–September 2017.**

400

## 401 **Supporting information legends**

402 S1 Table. Enrolled patients and the newborns were followed up post hospital discharge to  
403 ascertain their vital status.

404 S1 Fig. Number of patients diagnosed with acute jaundice, provided a blood specimen and  
405 followed up post hospital discharge in the six tertiary hospitals in Bangladesh.

## 406 **Acknowledgements**

407           We are grateful to the collaborating hospitals for their interest, enthusiasm and  
408 efforts for this study. We gratefully acknowledge the contribution of the study participants  
409 and the surveillance medical officers. We are thankful to the field assistants of icddr,b and  
410 laboratory staff of IEDCR for their hard work in this study.

## 411 References

- 412 1. Khuroo MS. Study of an epidemic of non-A, non-B hepatitis. Possibility of another human  
413 hepatitis virus distinct from post-transfusion non-A, non-B type. *Am J Med.* 1980;68(6):818-24.  
414 PubMed PMID: 6770682.
- 415 2. Aggarwal R, Krawczynski K. Hepatitis E: an overview and recent advances in clinical and  
416 laboratory research. *J Gastroenterol Hepatol.* 2000;15(1):9-20. Epub 2000/03/17. PubMed  
417 PMID: 10719741.
- 418 3. Wong DC, Purcell RH, Sreenivasan MA, Prasad SR, Pavri KM. Epidemic and endemic hepatitis in  
419 India: evidence for a non-A, non-B hepatitis virus aetiology. *Lancet.* 1980;2(8200):876-9.  
420 PubMed PMID: 6107544.
- 421 4. Emerson SU, Purcell RH. Hepatitis E virus. *Rev Med Virol.* 2003;13(3):145-54.
- 422 5. Okamoto H. Genetic variability and evolution of hepatitis E virus. *Virus Res.* 2007;127(2):216-  
423 28. doi: 10.1016/j.virusres.2007.02.002. PubMed PMID: 17363102.
- 424 6. Lu L, Li C, Hagedorn CH. Phylogenetic analysis of global hepatitis E virus sequences: genetic  
425 diversity, subtypes and zoonosis. *Rev Med Virol.* 2006;16(1):5-36.
- 426 7. Roberts JK, Whitlock RT. Hepatitis E in a traveler to Bangladesh. *Ann Intern Med.*  
427 1992;117(1):93. PubMed PMID: 1596057.
- 428 8. Dawson GJ, Mushahwar IK, Chau KH, Gitnick GL. Detection of long-lasting antibody to hepatitis  
429 E virus in a US traveller to Pakistan. *Lancet.* 1992;340(8816):426-7. PubMed PMID: 1353576.
- 430 9. Sazzad HM, Labrique AB, Teo C-G, Luby SP, Gurley ES. Surveillance at private laboratories  
431 identifies small outbreaks of hepatitis E in urban Bangladesh. *Am J Trop Med Hyg.*  
432 2017;96(2):395-9.
- 433 10. Mast EE, Krawczynski K. Hepatitis E: an overview. *Annu Rev Med.* 1996;47:257-66. Epub  
434 1996/01/01. doi: 10.1146/annurev.med.47.1.257. PubMed PMID: 8712780.
- 435 11. Naik SR, Aggarwal R, Salunke PN, Mehrotra NN. A large waterborne viral hepatitis E epidemic  
436 in Kanpur, India. *Bull World Health Organ.* 1992;70(5):597-604. PubMed PMID: 1464145;  
437 PubMed Central PMCID: PMC2393368.
- 438 12. Gurley ES, Hossain MJ, Paul RC, Sazzad HM, Islam MS, Parveen S, et al. Outbreak of hepatitis E  
439 in urban Bangladesh resulting in maternal and perinatal mortality. *Clin Infect Dis.*  
440 2014;59(5):658-65. doi: 10.1093/cid/ciu383. PubMed PMID: 24855146; PubMed Central  
441 PMCID: PMC4130310.
- 442 13. Aggarwal R, Jameel S. Hepatitis E. *Hepatology.* 2011;54(6):2218-26. Epub 2011/09/21. doi:  
443 10.1002/hep.24674. PubMed PMID: 21932388.
- 444 14. Verghese VP, Robinson JL. A systematic review of hepatitis E virus infection in children. *Clin*  
445 *Infect Dis.* 2014;59(5):689-97.
- 446 15. Arankalle VA, Tsarev SA, Chadha MS, Alling DW, Emerson SU, Banerjee K, et al. Age-specific  
447 prevalence of antibodies to hepatitis A and E viruses in Pune, India, 1982 and 1992. *J Infect Dis.*  
448 1995;171(2):447-50.
- 449 16. Purcell RH, Emerson SU. Hepatitis E: an emerging awareness of an old disease. *J Hepatol.*  
450 2008;48(3):494-503. doi: 10.1016/j.jhep.2007.12.008. PubMed PMID: 18192058.
- 451 17. Dalton HR, Stableforth W, Thurairajah P, Hazeldine S, Remnarace R, Usama W, et al.  
452 Autochthonous hepatitis E in Southwest England: natural history, complications and seasonal

- 453 variation, and hepatitis E virus IgG seroprevalence in blood donors, the elderly and patients  
454 with chronic liver disease. *Eur J Gastroenterol Hepatol.* 2008;20(8):784-90. doi:  
455 10.1097/MEG.0b013e3282f5195a. PubMed PMID: 18617784.
- 456 18. Bile K, Isse A, Mohamud O, Allebeck P, Nilsson L, Norder H, et al. Contrasting roles of rivers and  
457 wells as sources of drinking water on attack and fatality rates in a hepatitis E epidemic in  
458 Somalia. *Am J Trop Med Hyg.* 1994;51(4):466-74. Epub 1994/10/01. PubMed PMID: 7943574.
- 459 19. Boccia D, Guthmann JP, Klovstad H, Hamid N, Tatay M, Ciglenecki I, et al. High mortality  
460 associated with an outbreak of hepatitis E among displaced persons in Darfur, Sudan. *Clin  
461 Infect Dis.* 2006;42(12):1679-84. Epub 2006/05/18. doi: CID38294 [pii]  
462 10.1086/504322. PubMed PMID: 16705571.
- 463 20. Escriba JM, Nakoune E, Recio C, Massamba PM, Matsika-Claquin MD, Goumba C, et al.  
464 Hepatitis E, Central African Republic. *Emerg Infect Dis.* 2008;14(4):681-3. Epub 2008/04/09.  
465 doi: 10.3201/eid1404.070833. PubMed PMID: 18394300.
- 466 21. Teshale EH, Howard CM, Grytdal SP, Handzel TR, Barry V, Kamili S, et al. Hepatitis E epidemic,  
467 Uganda. *Emerg Infect Dis.* 2010;16(1):126-9. doi: 10.3201/eid1601.090764. PubMed PMID:  
468 20031058; PubMed Central PMCID: PMC2874362.
- 469 22. Rayis DA, Jumaa AM, Gasim GI, Karsany MS, Adam I. An outbreak of hepatitis E and high  
470 maternal mortality at Port Sudan, Eastern Sudan. *Pathogens and global health.*  
471 2013;107(2):66-8.
- 472 23. Tsega E, Hansson BG, Krawczynski K, Nordenfelt E. Acute sporadic viral hepatitis in Ethiopia:  
473 causes, risk factors, and effects on pregnancy. *Clin Infect Dis.* 1992;14(4):961-5. Epub  
474 1992/04/01. PubMed PMID: 1576296.
- 475 24. Khuroo MS, Kamili S. Aetiology, clinical course and outcome of sporadic acute viral hepatitis in  
476 pregnancy. *J Viral Hepat.* 2003;10(1):61-9. PubMed PMID: 12558914.
- 477 25. Khuroo MS, Kamili S, Jameel S. Vertical transmission of hepatitis E virus. *Lancet.*  
478 1995;345(8956):1025-6. PubMed PMID: 7723501.
- 479 26. World Health Organization. Global health sector strategy on viral hepatitis 2016-2021: Towards  
480 ending viral hepatitis. 2016 [Cited July 28, 2017]. Available from:  
481 <http://apps.who.int/iris/bitstream/10665/246177/1/WHO-HIV-2016.06-eng.pdf>.
- 482 27. Zhu FC, Zhang J, Zhang XF, Zhou C, Wang ZZ, Huang SJ, et al. Efficacy and safety of a  
483 recombinant hepatitis E vaccine in healthy adults: a large-scale, randomised, double-blind  
484 placebo-controlled, phase 3 trial. *Lancet.* 2010;376(9744):895-902. Epub 2010/08/24. doi:  
485 S0140-6736(10)61030-6 [pii]  
486 10.1016/S0140-6736(10)61030-6. PubMed PMID: 20728932.
- 487 28. Zhao Y, Zhang X, Zhu F, Jin H, Wang B. A preliminary cost-effectiveness analysis of hepatitis E  
488 vaccination among pregnant women in epidemic regions. *Hum Vaccin Immunother.*  
489 2016;12(8):2003-9.
- 490 29. World Health Organization. Meeting of the Strategic Advisory Group of Experts on  
491 immunization, October 2014 – conclusions and recommendations. [Cited December 03, 2017].  
492 Available from: [http://apps.who.int/iris/bitstream/handle/10665/242296/WER8950\\_561-  
493 576.PDF?sequence=1&isAllowed=y](http://apps.who.int/iris/bitstream/handle/10665/242296/WER8950_561-576.PDF?sequence=1&isAllowed=y).
- 494 30. Drobeniuc J, Greene-Montfort T, Le NT, Mixson-Hayden TR, Ganova-Raeva L, Dong C, et al.  
495 Laboratory-based surveillance for hepatitis E virus infection, United States, 2005-2012. *Emerg  
496 Infect Dis.* 2013;19(2):218-22; quiz 353. doi: 10.3201/eid1902.120961. PubMed PMID:  
497 23347695; PubMed Central PMCID: PMC3563276.

- 498 31. Aspinall EJ, Couturier E, Faber M, Said B, Ijaz S, Tivoschi L, et al. Hepatitis E virus infection in  
499 Europe: surveillance and descriptive epidemiology of confirmed cases, 2005 to 2015. *Euro*  
500 *Surveill.* 2017;22(26).
- 501 32. Murthy KAS, Khan IM, Kiran PK, Hakeem H, editors. A study of viral hepatitis E infection in a  
502 tertiary care hospital in Mysore, South india. *Open forum infectious diseases*; 2014: Oxford  
503 University Press.
- 504 33. Chandra NS, Ojha D, Chatterjee S, Chattopadhyay D. Prevalence of hepatitis E virus infection in  
505 West Bengal, India: A hospital-based study. *J Med Microbiol.* 2014;63(7):975-80.
- 506 34. Mamun-Al-Mahtab SR, Khan M, Karim F. HEV infection as an aetiologic factor for acute  
507 hepatitis: experience from a tertiary hospital in Bangladesh. *Journal of Health, Population, and*  
508 *Nutrition.* 2009;27(1):14.
- 509 35. World Health Organization. The global prevalence of hepatitis E virus infection and  
510 susceptibility: A systematic review. 2010. [Cited March 12, 2018]. Available from:  
511 [http://apps.who.int/iris/bitstream/10665/70513/1/WHO\\_IVB\\_10.14\\_eng.pdf](http://apps.who.int/iris/bitstream/10665/70513/1/WHO_IVB_10.14_eng.pdf).
- 512 36. World Health Organization. A systematic review on hepatitis E virus globally. 2014. [Cited  
513 March 11, 2018]. Available from:  
514 [http://www.who.int/immunization/sage/meetings/2014/october/7\\_summary\\_HEV\\_systematic\\_review.pdf](http://www.who.int/immunization/sage/meetings/2014/october/7_summary_HEV_systematic_review.pdf).  
515
- 516 37. Sheikh A, Sugitani M, Kinukawa N, Moriyama M, Arakawa Y, Komiyama K, et al. Hepatitis e  
517 virus infection in fulminant hepatitis patients and an apparently healthy population in  
518 Bangladesh. *Am J Trop Med Hyg.* 2002;66(6):721-4.
- 519 38. Mahtab M-A, Rahman S, Khan M, Karim MF. Hepatitis E virus is a leading cause of acute-on-  
520 chronic liver disease: experience from a tertiary centre in Bangladesh. *Hepatobiliary Pancreat*  
521 *Dis Int.* 2009;8(1):50-2.
- 522 39. Pisati M. SPMAP: Stata module to visualize spatial data. [Cited June 25, 2019]. Available from:  
523 <https://econpapers.repec.org/software/bocbocode/s456812.htm>.
- 524 40. Kryger P, Mathiesen LR, Aldershville J, Nielsen JO. Presence and meaning of anti-HBc IgM as  
525 determined by ELISA in patients with acute type B hepatitis and healthy HBsAg carriers.  
526 *Hepatology.* 1981;1(3):233-7. PubMed PMID: 7286902.
- 527 41. Jothikumar N, Cromeans TL, Robertson BH, Meng XJ, Hill VR. A broadly reactive one-step real-  
528 time RT-PCR assay for rapid and sensitive detection of hepatitis E virus. *J Virol Methods.*  
529 2006;131(1):65-71. doi: 10.1016/j.jviromet.2005.07.004. PubMed PMID: 16125257.
- 530 42. Brown LD, Cai TT, DasGupta A. Interval estimation for a binomial proportion. *Statistical*  
531 *science.* 2001:101-17.
- 532 43. Kumar S, Ratho RK, Chawla YK, Chakraborti A. The incidence of sporadic viral hepatitis in North  
533 India: a preliminary study. *Hepatobiliary Pancreat Dis Int.* 2007;6(6):596-9. PubMed PMID:  
534 18086624.
- 535 44. Bangladesh Bureau of Statistics. Quaterly labour force survey Bangladesh 2015-16. March  
536 2017. [cited March 11, 2018]. Available from:  
537 [http://bbs.portal.gov.bd/sites/default/files/files/bbs.portal.gov.bd/page/96220c5a\\_5763\\_4628\\_9494\\_950862accd8c/QLFS\\_2015.pdf](http://bbs.portal.gov.bd/sites/default/files/files/bbs.portal.gov.bd/page/96220c5a_5763_4628_9494_950862accd8c/QLFS_2015.pdf).  
538
- 539 45. Saikia N, Bora JK. Gender difference in health-care expenditure: evidence from India human  
540 development survey. *PLoS One.* 2016;11(7):e0158332.
- 541 46. Labrique AB, Zaman K, Hossain Z, Saha P, Yunus M, Hossain A, et al. An exploratory case  
542 control study of risk factors for hepatitis E in rural Bangladesh. *PLoS One.* 2013;8(5):e61351.

- 543 47. Simon AK, Hollander GA, McMichael A. Evolution of the immune system in humans from  
544 infancy to old age. *Proceedings of the Royal Society B: Biological Sciences*.  
545 2015;282(1821):20143085.
- 546 48. Wasley A, Fiore A, Bell BP. Hepatitis A in the era of vaccination. *Epidemiol Rev*. 2006;28(1):101-  
547 11.
- 548 49. Green MS, Block C, Slater PE. Rise in the incidence of viral hepatitis in Israel despite improved  
549 socioeconomic conditions. *Rev Infect Dis*. 1989;11(3):464-9.
- 550 50. Petersiel N, Shresta S, Tamrakar R, Koju R, Madhup S, Shresta A, et al. The epidemiology of  
551 typhoid fever in the Dhulikhel area, Nepal: A prospective cohort study. *PLoS One*.  
552 2018;13(9):e0204479.
- 553 51. Centre for Urban Studies (CUS), National Institute of Population Research and Training  
554 (NIPORT), MEASURE Evaluation. *Slums of Urban Bangladesh: Mapping and Census, 2005*.  
555 Dhaka, Bangladesh and Chapell Hill, USA. 2006. [cited August 19, 2018]. Available from:  
556 <https://www.measureevaluation.org/resources/publications/tr-06-35>.
- 557 52. Huang S, Zhang X, Jiang H, Yan Q, Ai X, Wang Y, et al. Profile of acute infectious markers in  
558 sporadic hepatitis E. *PLoS One*. 2010;5(10):e13560.
- 559 53. Petrik J, Lozano M, Seed CR, Faddy HM, Keller AJ, Prado Scuracchio PS, et al. Hepatitis E. *Vox*  
560 *Sang*. 2016;110(1):93-103.
- 561 54. Dalton HR, Bendall R, Ijaz S, Banks M. Hepatitis E: an emerging infection in developed  
562 countries. *Lancet Infect Dis*. 2008;8(11):698-709. doi: 10.1016/S1473-3099(08)70255-X.  
563 PubMed PMID: 18992406.
- 564 55. Innis BL, Seriwatana J, Robinson RA, Shrestha MP, Yarbough PO, Longer CF, et al. Quantitation  
565 of immunoglobulin to hepatitis E virus by enzyme immunoassay. *Clin Diagn Lab Immunol*.  
566 2002;9(3):639-48.
- 567 56. Bendall R, Ellis V, Ijaz S, Thurairajah P, Dalton H. Serological response to hepatitis E virus  
568 genotype 3 infection: IgG quantitation, avidity, and IgM response. *J Med Virol*. 2008;80(1):95-  
569 101.
- 570
- 571

572 **S1 Checklist. STROBE checklist.**

573 STROBE Statement—Checklist of items that should be included in reports of *cross-sectional studies*

|                              | Item No | Recommendation                                                                                                                                                                       | Page No. |
|------------------------------|---------|--------------------------------------------------------------------------------------------------------------------------------------------------------------------------------------|----------|
| <b>Title and abstract</b>    | 1       | (a) Indicate the study's design with a commonly used term in the title or the abstract                                                                                               | 2        |
|                              |         | (b) Provide in the abstract an informative and balanced summary of what was done and what was found                                                                                  | 2-3      |
| <b>Introduction</b>          |         |                                                                                                                                                                                      |          |
| Background/rationale         | 2       | Explain the scientific background and rationale for the investigation being reported                                                                                                 | 5-6      |
| Objectives                   | 3       | State specific objectives, including any prespecified hypotheses                                                                                                                     | 6        |
| <b>Methods</b>               |         |                                                                                                                                                                                      |          |
| Study design                 | 4       | Present key elements of study design early in the paper                                                                                                                              | 7        |
| Setting                      | 5       | Describe the setting, locations, and relevant dates, including periods of recruitment, exposure, follow-up, and data collection                                                      | 7-11     |
| Participants                 | 6       | (a) Give the eligibility criteria, and the sources and methods of selection of participants                                                                                          | 8-9      |
| Variables                    | 7       | Clearly define all outcomes, exposures, predictors, potential confounders, and effect modifiers. Give diagnostic criteria, if applicable                                             | 9-10     |
| Data sources/<br>measurement | 8*      | For each variable of interest, give sources of data and details of methods of assessment (measurement). Describe comparability of assessment methods if there is more than one group | 7-11     |
| Bias                         | 9       | Describe any efforts to address potential sources of bias                                                                                                                            | N/A      |
| Study size                   | 10      | Explain how the study size was arrived at                                                                                                                                            | N/A      |
| Quantitative variables       | 11      | Explain how quantitative variables were handled in the analyses. If applicable, describe which groupings were chosen and why                                                         | 11-12    |
| Statistical methods          | 12      | (a) Describe all statistical methods, including those used to control for confounding                                                                                                | 1-12     |
|                              |         | (b) Describe any methods used to examine subgroups and interactions                                                                                                                  | N/A      |
|                              |         | (c) Explain how missing data were addressed                                                                                                                                          | N/A      |

|                   |     |                                                                                                                                                                                                              |       |
|-------------------|-----|--------------------------------------------------------------------------------------------------------------------------------------------------------------------------------------------------------------|-------|
|                   |     | (d) If applicable, describe analytical methods taking account of sampling strategy                                                                                                                           | N/A   |
|                   |     | (e) Describe any sensitivity analyses                                                                                                                                                                        | N/A   |
| <b>Results</b>    |     |                                                                                                                                                                                                              |       |
| Participants      | 13* | (a) Report numbers of individuals at each stage of study—eg numbers potentially eligible, examined for eligibility, confirmed eligible, included in the study, completing follow-up, and analysed            | 13    |
|                   |     | (b) Give reasons for non-participation at each stage                                                                                                                                                         | N/A   |
|                   |     | (c) Consider use of a flow diagram                                                                                                                                                                           | 32    |
| Descriptive data  | 14* | (a) Give characteristics of study participants (eg demographic, clinical, social) and information on exposures and potential confounders                                                                     | 13-14 |
|                   |     | (b) Indicate number of participants with missing data for each variable of interest                                                                                                                          | N/A   |
| Outcome data      | 15* | Report numbers of outcome events or summary measures                                                                                                                                                         | 13    |
| Main results      | 16  | (a) Give unadjusted estimates and, if applicable, confounder-adjusted estimates and their precision (eg, 95% confidence interval). Make clear which confounders were adjusted for and why they were included | 13-15 |
|                   |     | (b) Report category boundaries when continuous variables were categorized                                                                                                                                    | N/A   |
|                   |     | (c) If relevant, consider translating estimates of relative risk into absolute risk for a meaningful time period                                                                                             | N/A   |
| Other analyses    | 17  | Report other analyses done—eg analyses of subgroups and interactions, and sensitivity analyses                                                                                                               | 18-21 |
| <b>Discussion</b> |     |                                                                                                                                                                                                              |       |
| Key results       | 18  | Summarise key results with reference to study objectives                                                                                                                                                     | 22    |
| Limitations       | 19  | Discuss limitations of the study, taking into account sources of potential bias or imprecision. Discuss both direction and magnitude of any potential bias                                                   | 24    |
| Interpretation    | 20  | Give a cautious overall interpretation of results considering objectives, limitations, multiplicity of analyses, results from                                                                                | 22-25 |



similar studies, and other relevant evidence

---

|                  |    |                                                                       |       |
|------------------|----|-----------------------------------------------------------------------|-------|
| Generalisability | 21 | Discuss the generalisability (external validity) of the study results | 24-25 |
|------------------|----|-----------------------------------------------------------------------|-------|

---

**Other information**

|         |    |                                                                                                                                                               |     |
|---------|----|---------------------------------------------------------------------------------------------------------------------------------------------------------------|-----|
| Funding | 22 | Give the source of funding and the role of the funders for the present study and, if applicable, for the original study on which the present article is based | N/A |
|---------|----|---------------------------------------------------------------------------------------------------------------------------------------------------------------|-----|

---

574

575 \*Give information separately for exposed and unexposed groups.

576

577 **Note:** An Explanation and Elaboration article discusses each checklist item and gives methodological  
578 background and published examples of transparent reporting. The STROBE checklist is best used in conjunction  
579 with this article (freely available on the Web sites of PLoS Medicine at <http://www.plosmedicine.org/>, Annals of  
580 Internal Medicine at <http://www.annals.org/>, and Epidemiology at <http://www.epidem.com/>). Information on the  
581 STROBE Initiative is available at [www.strobe-statement.org](http://www.strobe-statement.org).

582

583 **S1 Table. Post hospital discharge follow-up schedule of enrolled patients in the**  
 584 **surveillance hospitals**

| <b>Patient type</b>                                          | <b>Timing of follow-up</b>        |                                     |                                          |
|--------------------------------------------------------------|-----------------------------------|-------------------------------------|------------------------------------------|
|                                                              | <b>1 week after delivery date</b> | <b>3 months after delivery date</b> | <b>3 months after hospital discharge</b> |
| Non-pregnant women and adult men                             |                                   |                                     | √                                        |
| Pregnant women delivered in hospital                         | √                                 | √                                   |                                          |
| Pregnant women discharged from hospital before 3rd trimester | √                                 | √                                   | √                                        |
| Pregnant women discharged from hospital during 3rd trimester | √                                 | √                                   |                                          |

585

586 **S1 Fig. Flow chart of patient enrolment, laboratory testing and follow-up in the**  
587 **surveillance hospitals**  
588

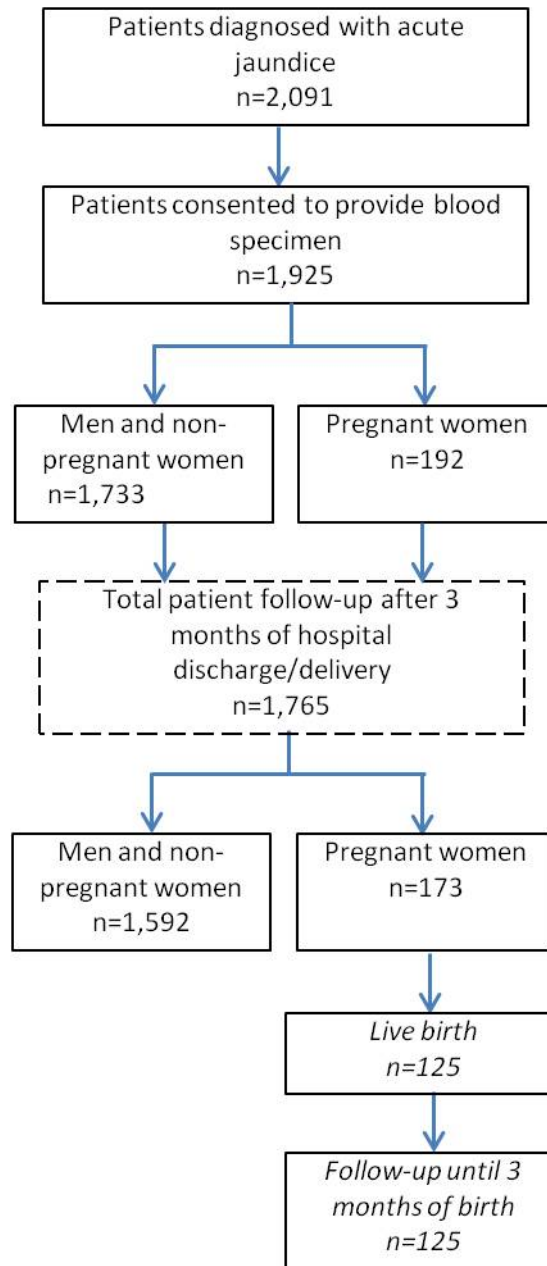

589

590

591 **S2 Table. Hepatitis E serological test results by educational status and residence (rural-**  
 592 **urban) of patients with acute jaundice in six tertiary hospitals in Bangladesh, December**  
 593 **2014–September 2017**

| Characteristics                                   | Rural (N=1494) |                       | Urban (N=431)  |                       | Total (N=1925) |                       |
|---------------------------------------------------|----------------|-----------------------|----------------|-----------------------|----------------|-----------------------|
|                                                   | Patient tested | Anti-HEV IgM Positive | Patient tested | Anti-HEV IgM Positive | Patient tested | Anti-HEV IgM Positive |
|                                                   |                | n (%)                 |                | n (%)                 |                | n (%)                 |
| Education                                         |                |                       |                |                       |                |                       |
| None                                              | 316            | 51 (16)               | 67             | 12 (18)               | 383            | 63 (16)               |
| Class 1-5                                         | 482            | 137 (28)              | 92             | 38 (41)               | 574            | 175 (31)              |
| Class 6-11                                        | 460            | 175 (38)              | 184            | 84 (46)               | 644            | 259 (40)              |
| Class 12 or more                                  | 236            | 120 (51)              | 88             | 44 (50)               | 324            | 164 (51)              |
| Monthly household expenditure in Bangladeshi taka |                |                       |                |                       |                |                       |
| < 5000 (US\$ 62)                                  | 236            | 40 (17)               | 34             | 8 (24)                | 270            | 48 (18)               |
| 5000-9,999 (US\$ 63-125)                          | 595            | 171 (29)              | 122            | 43 (35)               | 717            | 214 (30)              |
| 10,000-14,999 (US\$ 126-187)                      | 314            | 110 (35)              | 85             | 32 (38)               | 399            | 142 (36)              |
| ≥ 15,000 (US\$ 188)                               | 201            | 79 (39)               | 127            | 59 (46)               | 328            | 138 (42)              |

594
